# Supplementary material for: Self-assembly-induced near-infrared fluorescent nanoprobes for effective tumor molecular imaging
Source: Royal Society of Chemistry journal article supplement (doi:10.1039/c4tb00761a), 2014-01-01
Supplement: c4tb00761a1.pdf [file c4tb00761a1.pdf]

**Electronic Supplementary Material**

**Self-assembly-induced near-infrared fluorescence nanoprobe for  
effective tumor molecular imaging**

**Hao Wu<sup>a,b</sup>, Haidong Zhao<sup>c</sup>, Xiaojie Song<sup>a,b</sup>, Shen Li<sup>a,b</sup>, Xiaojun Ma<sup>a</sup>, and Mingqian Tan<sup>a</sup>**

*<sup>a</sup> Division of Biotechnology, Dalian Institute of Chemical Physics, Chinese Academy of Sciences,  
457 Zhongshan Road, Dalian 116023, China; Fax: +86-411-84379139; [maxj@dicp.ac.cn](mailto:maxj@dicp.ac.cn);  
[mqtan@dicp.ac.cn](mailto:mqtan@dicp.ac.cn)*

*<sup>b</sup> University of the Chinese Academy of Sciences, Beijing 100049, China*

*<sup>c</sup> The Second Affiliated Hospital of Dalian Medical University, 467 Zhongshan Road, Dalian  
116023, China*

## Characterization

$^1\text{H}$  NMR spectra were recorded on a Bruker Avance III 400 MHz NMR spectrometer in  $\text{D}_2\text{O}$  solutions. High-resolution transmission electron microscopy (HR-TEM) images were collected on an electron microscope (JEM-2100, JEOL), using a 200 kV accelerating voltage. Zeta potential measurements were performed on a Zetasizer Nanoseries (ZS, Malvern).

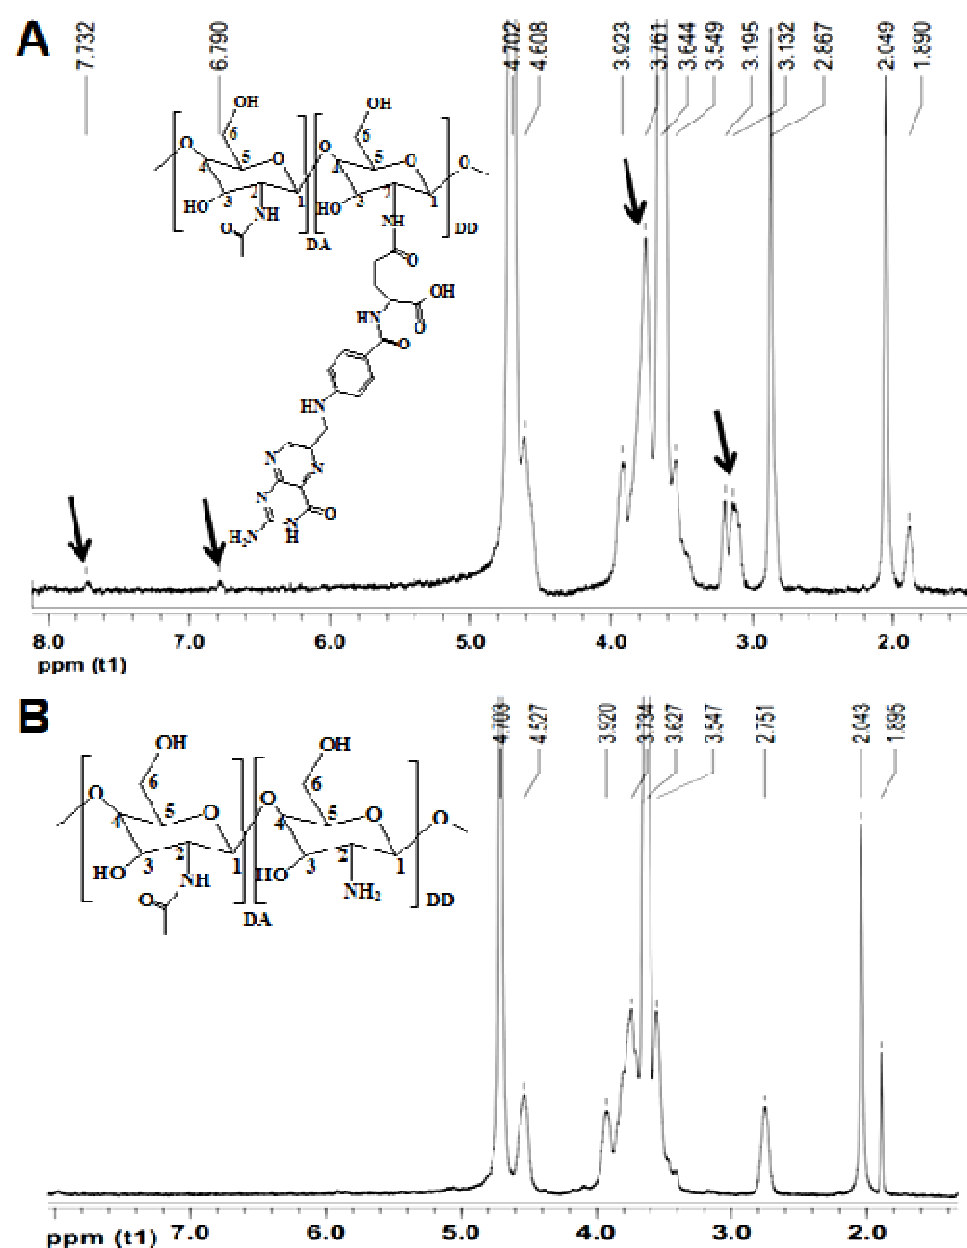

**Fig. S1** in the Electronic Supplementary Material (ESM).  $^1\text{H}$  NMR spectra of (A) FA-WCS and (B)

WCS. Insets show the structures of (A) FA-WCS and (B) WCS. The signals indicated by arrows are assigned to the H of folic acid.

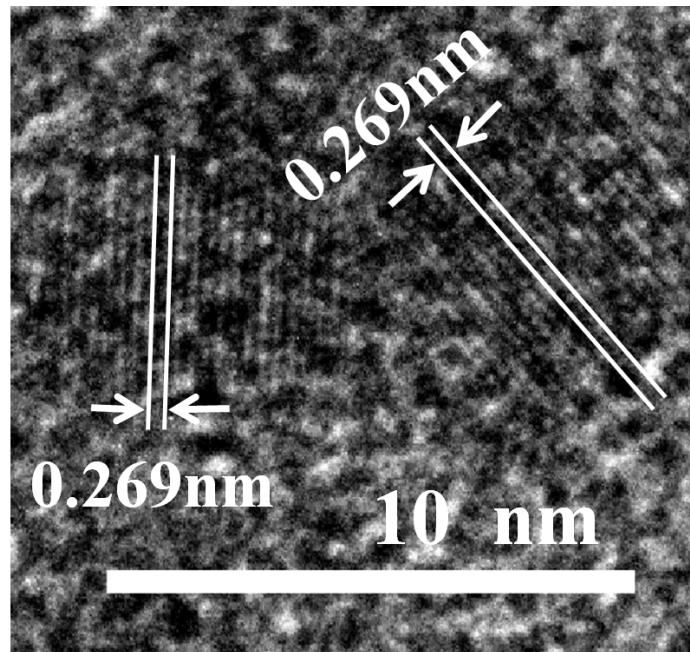

**Fig. S2.** in the ESM. HR-TEM image shows the lattice planes of ICG-FA-WCS NPs (mass ratio of FA-WCS to ICG= 25:1) prepared in ultrapure water solution.

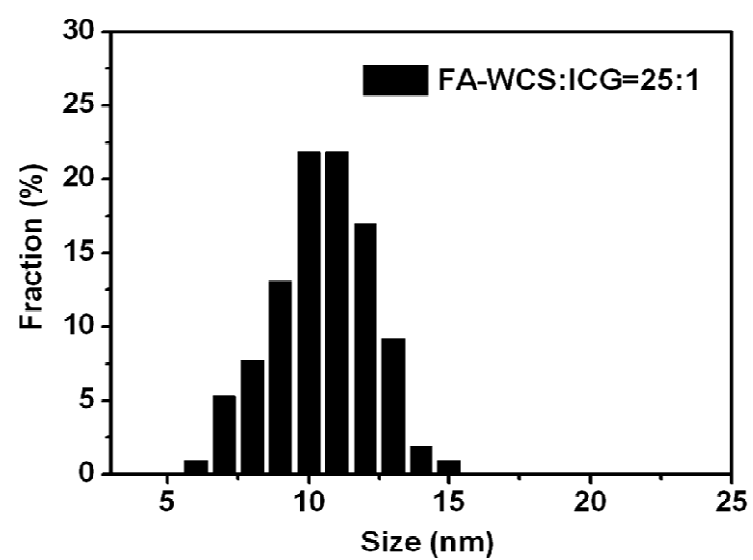

Fig. S3 in the ESM. Particle size distribution curve of the ICG-FA-WCS (mass ratio of FA-WCS to ICG= 25:1) NPs prepared in ultrapure water solution. The average particle size was calculated by analysis of 200 particles.

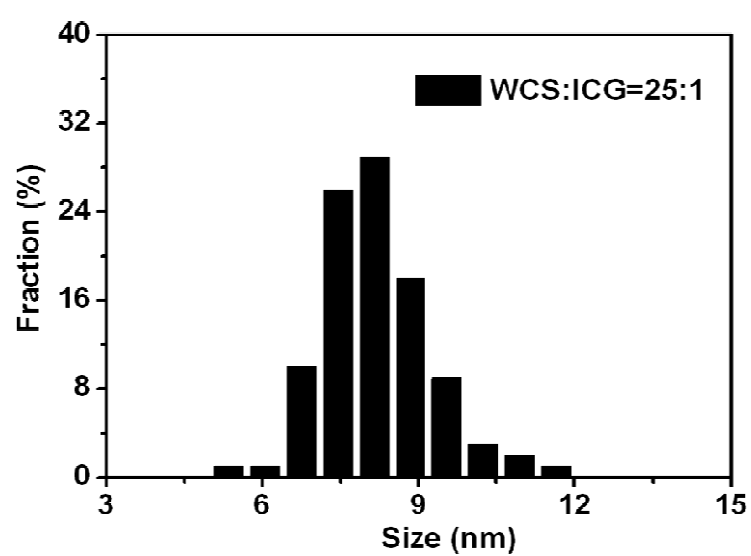

**Fig. S4** in the ESM. Particle size distribution curve of the ICG-WCS (mass ratio of WCS to ICG= 25:1) NPs prepared in ultrapure water solution. The average particle size was calculated by analysis of 200 particles.

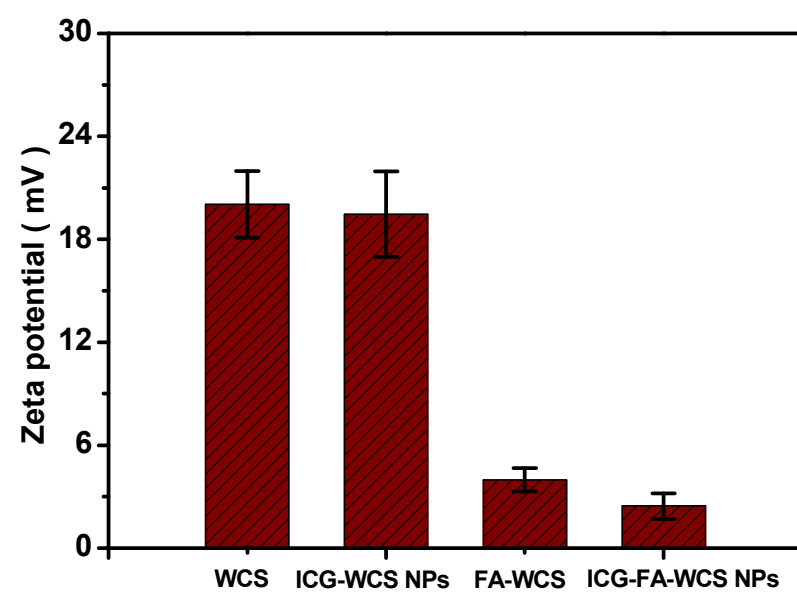

**Fig. S5** in the ESM. Zeta potential of the WCS and ICG-WCS NPs; FA-WCS, ICG-FA-WCS NPs (mass ratio of WCS or FA-WCS to ICG = 25:1) in ultrapure water. (N = 3).

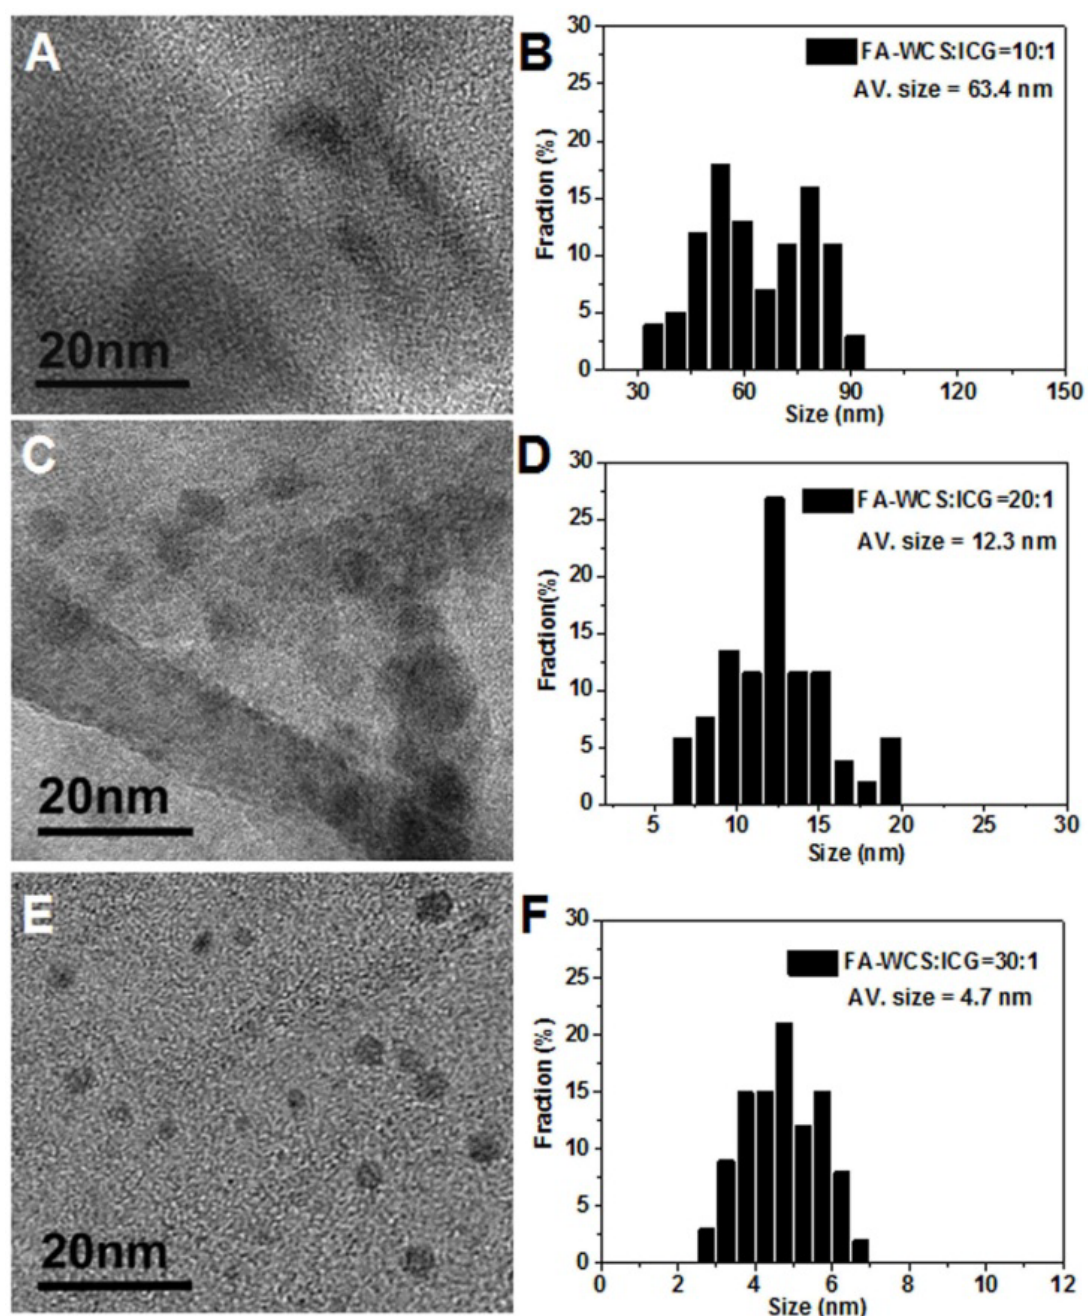

**Fig. S6** in the ESM. HR-TEM images of the ICG-FA-WCS NPs with mass ratio of FA-WCS to ICG = 10:1 (A), 20:1 (C) and 30:1 (E) prepared in ultrapure water solution. Particle size distribution curve of the ICG-FA-WCS NPs with mass ratio of FA-WCS to ICG = 10:1 (B), 20:1(D) and 30:1(F) based on the analysis of 200 particles.

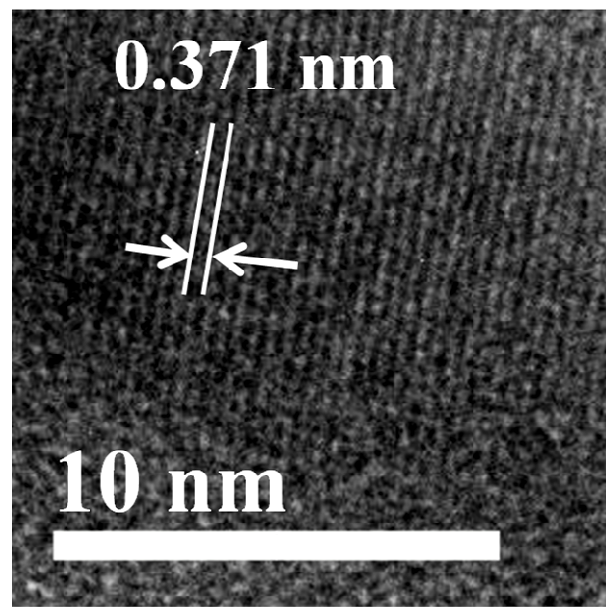

**Fig. S7** in the ESM. HR-TEM image shows the lattice planes of ICG-FA-WCS NPs (mass ratio of FA-WCS to ICG= 10:1) prepared in ultrapure water solution.

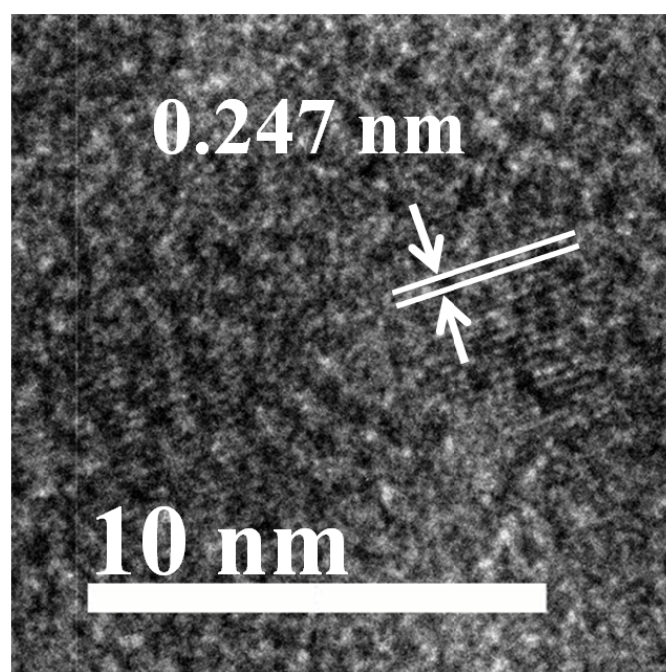

**Fig. S8** in the ESM. HR-TEM image shows the lattice planes of ICG-FA-WCS NPs (mass ratio of FA-WCS to ICG= 20:1) prepared in ultrapure water solution.

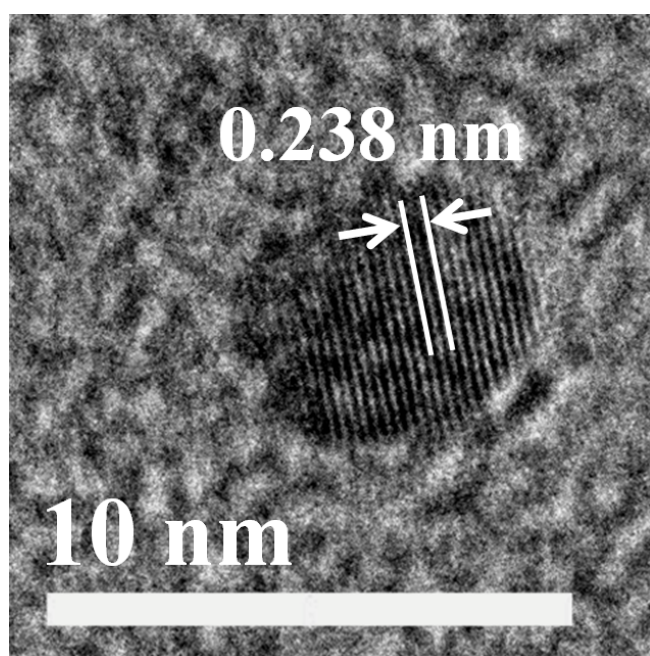

**Fig. S9** in the ESM. HR-TEM image shows the lattice planes of ICG-FA-WCS NPs (mass ratio of FA-WCS to ICG= 30:1) prepared in ultrapure water solution.
